# Supplementary material for: Divergence in male sexual odor signal and genetics across populations of the red mason bee, Osmia bicornis, in Europe
Source: PLOS journal article supplement (doi:10.1371/journal.pone.0193153), 2018-02-22
Supplement: S11 (10.1371/journal.pone.0193153.s011) [file journal.pone.0193153.s011]

**Table S7 Results from AMOVA analyses of *O. bicornis* microsatellite data from the two different color morphs in Denmark using ARLEQUIN to partition the total molecular variance among different hierarchical groups.**

| Source of variation                   | % of variation | P-value |
|---------------------------------------|----------------|---------|
| <b>All populations</b>                |                |         |
| Within same color morph               | 89.77          | <0.001  |
| Within population, among color morphs | 0.89           | 0.24    |
| Among populations                     | 9.34           | 0.13    |
